# Supplementary material for: Efficacy and Safety of Esketamine Nasal Spray in Patients with Treatment-Resistant Depression Who Completed a Second Induction Period: Analysis of the Ongoing SUSTAIN-3 Study
Source: Springer Nature journal article supplement (doi:10.1007/s40263-023-01026-3), 2023-08-01
Supplement: MOESM1 [file 25904190]

1 **Supplemental Material**

2

3 **Efficacy and Safety of Esketamine Nasal Spray in Patients With Treatment-Resistant Depression**  
4 **Who Completed a Second Induction Period: Analysis of the Ongoing SUSTAIN-3 Study**

5 **Journal:** *CNS Drugs*

6 **Authors:** Meredith Castro<sup>1</sup>, Samuel T. Wilkinson<sup>2</sup>, Rayan K. Al Jurdi<sup>3</sup>, Mary Pat Petrillo<sup>1</sup>, Naim Zaki<sup>4</sup>,  
7 Stephane Borentain<sup>4</sup>, Dong Jing Fu<sup>4</sup>, Ibrahim Turkoz<sup>4</sup>, Liping Sun<sup>5</sup>, Brianne Brown<sup>1</sup>, Patricia Cabrera<sup>1</sup>

8 **Affiliations:** <sup>1</sup>Janssen Scientific Affairs, LLC, Titusville, NJ, USA; <sup>2</sup>Department of Psychiatry, School of  
9 Medicine, Yale University, New Haven, CT, USA; <sup>3</sup>The Menninger Department of Psychiatry and  
10 Behavioral Sciences at Baylor College of Medicine, Houston, TX, USA; <sup>4</sup>Janssen Research &  
11 Development, LLC, Titusville, NJ, USA; <sup>5</sup>Cytel, Cambridge, MA, USA

12 **Corresponding Author:**

13 Meredith Castro, PharmD, MBA, CCP

14 Janssen Scientific Affairs, LLC

15 1125 Trenton-Harbourton Road

16 Titusville, NJ, 08560

17 Email: mcastr80@its.jnj.com

18 Phone: 610-554-5503

19

20

21 **Supplemental Figure 1. Mean (A) MADRS and (B) PHQ-9 total scores (LOCF) during the**  
 22 **reinduction and optimization/maintenance phases of SUSTAIN-3 among patients who previously**  
 23 **experienced relapse in SUSTAIN-1 in the combined PR-ESK+AD and PR-AD+PBO groups**

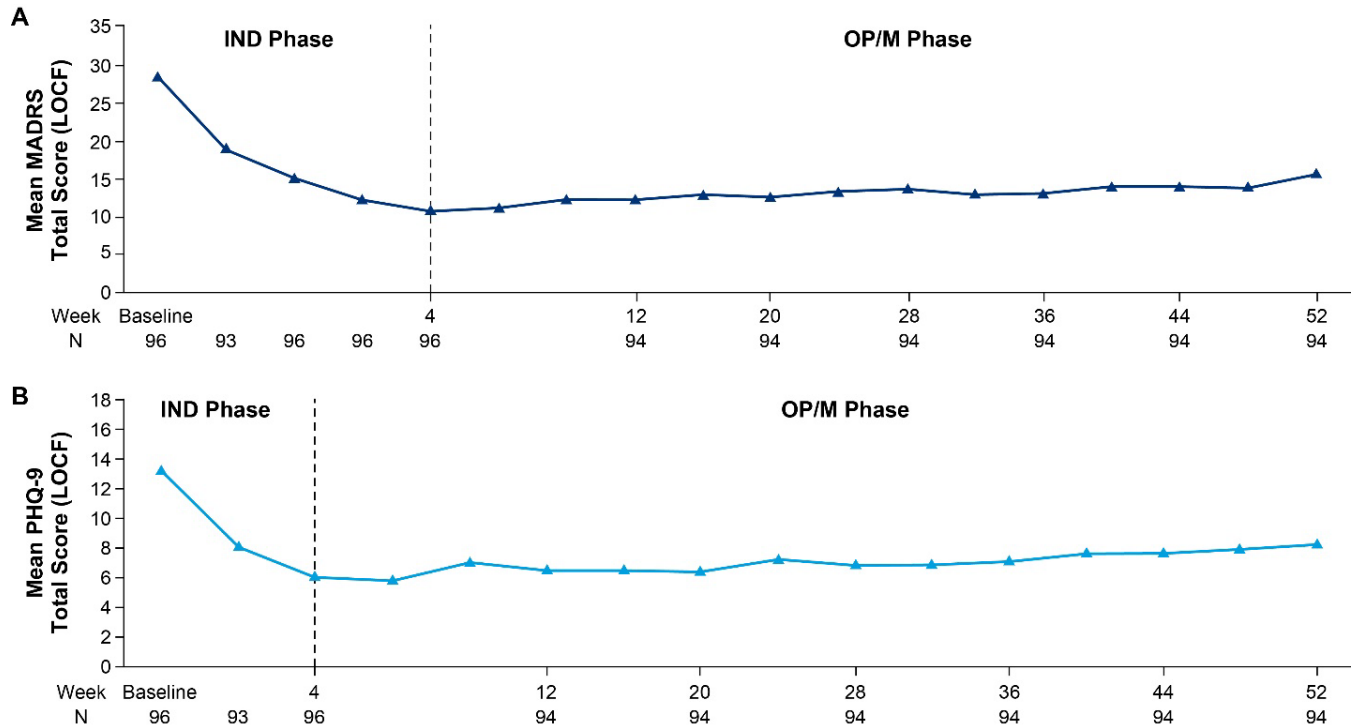

24

25 *AD* antidepressant, *ESK* esketamine nasal spray, *IND* induction, *LOCF* last observation carried  
 26 forward, *MADRS* Montgomery-Åsberg Depression Rating Scale, *OP/M*  
 27 optimization/maintenance phase, *PHQ-9* Patient Health Questionnaire 9-item, *PR-AD+PBO*  
 28 previously relapsed on an oral AD plus placebo, *PR-ESK+AD* previously relapsed on ESK plus an  
 29 oral AD

30
